# Supplementary material
Source: PubMed Central journal article supplement (PMC9528237)
Supplement: mmc3.pdf [file mmc3.pdf]

Supplemental Table 3. Selected peptide candidates to be tested

| Sequence  | Antigen | Start | Allele | Virus                  |
|-----------|---------|-------|--------|------------------------|
| CVAVTVAIL | A13L    | 11    | A001   | Sierra Leone and Zaire |
| VAVTVAILY | A13L    | 12    | A001   | Sierra Leone and Zaire |
| VTVAILYTL | A13L    | 14    | A001   | Sierra Leone and Zaire |
| QNPNPSPNL | A13L    | 30    | A001   | Sierra Leone and Zaire |
| RNTKRVNNL | A13L    | 46    | A001   | Sierra Leone and Zaire |
| ISNYEPLLL | A14.5L  | 2     | A001   | Sierra Leone and Zaire |
| YEPLLLVI  | A14.5L  | 5     | A001   | Sierra Leone and Zaire |
| FAVQTIVFI | A14.5L  | 34    | A001   | Sierra Leone and Zaire |
| QTIVFIWFI | A14.5L  | 37    | A001   | Sierra Leone and Zaire |
| FIWFIFHFV | A14.5L  | 41    | A001   | Sierra Leone and Zaire |
| ASITAFKSM | A26L    | 21    | A001   | Sierra Leone and Zaire |
| KSPLGAPMQ | A26L    | 71    | A001   | Sierra Leone and Zaire |
| ITNVGQYIL | A26L    | 115   | A001   | Sierra Leone and Zaire |
| GTPYIYDSE | A26L    | 137   | A001   | Sierra Leone and Zaire |
| GSPMYLWFN | A26L    | 184   | A001   | Sierra Leone and Zaire |
| LLYAFMYYL | A26L    | 217   | A001   | Sierra Leone and Zaire |
| YAFMYYSI  | A26L    | 219   | A001   | Sierra Leone and Zaire |
| LSVPEYILY | A26L    | 251   | A001   | Sierra Leone and Zaire |
| SVPEYILYG | A26L    | 252   | A001   | Sierra Leone and Zaire |
| YTVILARKI | A26L    | 466   | A001   | Sierra Leone and Zaire |
| LFPWPLPTV | A26L    | 480   | A001   | Sierra Leone and Zaire |
| YTNMEIFPV | A37R    | 3     | A001   | Sierra Leone and Zaire |
| ETVLLTNIL | A37R    | 48    | A001   | Sierra Leone and Zaire |
| ISPLSKCVV | A37R    | 111   | A001   | Sierra Leone and Zaire |
| VSKGPTTIL | A37R    | 120   | A001   | Sierra Leone and Zaire |
| KGPTTILVV | A37R    | 122   | A001   | Sierra Leone and Zaire |
| VTSFTNDIL | A37R    | 140   | A001   | Sierra Leone and Zaire |
| YLPSSVFII | A37R    | 158   | A001   | Sierra Leone           |
| YTNQTLSLV | A3L     | 21    | A001   | Sierra Leone and Zaire |
| LSCSVCNSL | A3L     | 41    | A001   | Sierra Leone and Zaire |
| STHDWSTRL | A3L     | 94    | A001   | Sierra Leone and Zaire |
| KSTLNNASV | A3L     | 153   | A001   | Sierra Leone and Zaire |
| VSVKCTHPL | A3L     | 161   | A001   | Sierra Leone and Zaire |
| ASPRIGDQL | A3L     | 176   | A001   | Sierra Leone and Zaire |
| YSPSNHHIL | A3L     | 191   | A001   | Sierra Leone and Zaire |
| LSTTRFQSM | A3L     | 200   | A001   | Sierra Leone and Zaire |
| IHPILMALF | A3L     | 232   | A001   | Sierra Leone and Zaire |
| KSINYMLLV | A3L     | 270   | A001   | Sierra Leone and Zaire |

| Sequence  | Antigen | Start | Allele | Virus                  |
|-----------|---------|-------|--------|------------------------|
| TTSDSPISI | A3L     | 396   | A001   | Sierra Leone and Zaire |
| FAPPNIGYG | A3L     | 423   | A001   | Sierra Leone and Zaire |
| GSAVHSPVI | A3L     | 448   | A001   | Sierra Leone and Zaire |
| VSPEIMLNG | A3L     | 493   | A001   | Sierra Leone and Zaire |
| LTMEEAMSM | A3L     | 609   | A001   | Sierra Leone and Zaire |
| ISARHITEL | A3L     | 635   | A001   | Sierra Leone and Zaire |
| HTAALVDVF | A47L    | 74    | A001   | Sierra Leone and Zaire |
| YTDNEIMKV | A47L    | 85    | A001   | Sierra Leone and Zaire |
| ISPGHVYAK | A47L    | 141   | A001   | Sierra Leone and Zaire |
| YSPSCSYDM | A47L    | 250   | A001   | Sierra Leone and Zaire |
| CSYDMFNLL | A47L    | 254   | A001   | Sierra Leone and Zaire |
| GSRIPRWML | A47L    | 272   | A001   | Sierra Leone and Zaire |
| RIPRWMLKM | A47L    | 274   | A001   | Sierra Leone and Zaire |
| YSPIFDVDV | A47L    | 325   | A001   | Sierra Leone and Zaire |
| TTPMIKENS | A8R     | 24    | A001   | Sierra Leone and Zaire |
| IVAPYIALL | A8R     | 92    | A001   | Sierra Leone and Zaire |
| VAPYIALLT | A8R     | 93    | A001   | Sierra Leone and Zaire |
| LTETMIEAF | A8R     | 109   | A001   | Sierra Leone and Zaire |
| WSASTGAVI | A8R     | 205   | A001   | Sierra Leone and Zaire |
| STGAVINQM | A8R     | 208   | A001   | Sierra Leone and Zaire |
| KTISVVTL  | B5R     | 2     | A001   | Sierra Leone and Zaire |
| YSTCTVPTM | B5R     | 18    | A001   | Sierra Leone and Zaire |
| YSFGEYMTI | B5R     | 147   | A001   | Sierra Leone and Zaire |
| CTANSWNVI | B5R     | 171   | A001   | Sierra Leone and Zaire |
| FSIGGVIHL | B5R     | 201   | A001   | Sierra Leone and Zaire |
| LSCKNGFTL | B5R     | 209   | A001   | Sierra Leone           |
| LSCKSGFTL | B5R     | 209   | A001   | Zaire                  |
| LTIMGVIFL | B5R     | 285   | A001   | Sierra Leone and Zaire |
| IYDAVRAFL | B6R     | 9     | A001   | Sierra Leone and Zaire |
| RSNTILHNI | B6R     | 31    | A001   | Sierra Leone and Zaire |
| FTRCTVIPF | B6R     | 43    | A001   | Sierra Leone and Zaire |
| CTVIPFDDI | B6R     | 46    | A001   | Sierra Leone and Zaire |
| ITGGVCYYL | B6R     | 159   | A001   | Sierra Leone and Zaire |
| LAVLFINSI | B8R     | 7     | A001   | Sierra Leone and Zaire |
| TSTGCSIDF | B8R     | 170   | A001   | Sierra Leone and Zaire |
| ATEGFLEKI | B8R     | 191   | A001   | Sierra Leone and Zaire |
| ITPWSSEVC | B8R     | 199   | A001   | Sierra Leone and Zaire |
| LTPKKNVYT | B8R     | 208   | A001   | Sierra Leone and Zaire |
| TSNDVTTFL | B8R     | 255   | A001   | Sierra Leone and Zaire |
| FSMGIQHEF | C7L     | 16    | A001   | Sierra Leone           |

| Sequence  | Antigen | Start | Allele | Virus                  |
|-----------|---------|-------|--------|------------------------|
| YTFYYVIYE | C7L     | 94    | A001   | Sierra Leone           |
| YSDDENELF | C7L     | 117   | A001   | Sierra Leone and Zaire |
| YYPYISLNM | C7L     | 128   | A001   | Sierra Leone and Zaire |
| SSPYIEHPL | C7L     | 149   | A001   | Sierra Leone and Zaire |
| YTDSVDDLI | D12L    | 41    | A001   | Sierra Leone and Zaire |
| STIYSFYKE | D12L    | 84    | A001   | Sierra Leone and Zaire |
| CSTDQFLKL | D12L    | 112   | A001   | Sierra Leone           |
| VVTREYITL | D12L    | 135   | A001   | Sierra Leone and Zaire |
| IAPEYRQRL | D12L    | 184   | A001   | Sierra Leone and Zaire |
| RFPHYFYV  | F8L/E9L | 33    | A001   | Sierra Leone and Zaire |
| VTDEIYQSL | F8L/E9L | 42    | A001   | Sierra Leone and Zaire |
| LSPPFNAR  | F8L/E9L | 50    | A001   | Sierra Leone and Zaire |
| CSVADMWLI | F8L/E9L | 83    | A001   | Sierra Leone and Zaire |
| ATMDEFLNI | F8L/E9L | 102   | A001   | Sierra Leone and Zaire |
| ISPDGCYSL | F8L/E9L | 119   | A001   | Sierra Leone and Zaire |
| ISHTSYCYI | F8L/E9L | 183   | A001   | Sierra Leone and Zaire |
| LTFDYVVTF | F8L/E9L | 254   | A001   | Sierra Leone and Zaire |
| ISKNAFSCM | F8L/E9L | 349   | A001   | Sierra Leone and Zaire |
| LTTGNYVTV | F8L/E9L | 389   | A001   | Sierra Leone and Zaire |
| TLPNDIYKL | F8L/E9L | 423   | A001   | Sierra Leone           |
| VLPQSMVFE | F8L/E9L | 487   | A001   | Sierra Leone and Zaire |
| STIIKGPLL | F8L/E9L | 499   | A001   | Sierra Leone           |
| KGPLLKLLL | F8L/E9L | 503   | A001   | Sierra Leone and Zaire |
| LSPETLVGV | F8L/E9L | 563   | A001   | Sierra Leone and Zaire |
| YPPRYITV  | F8L/E9L | 591   | A001   | Sierra Leone and Zaire |
| RLPNLISEI | F8L/E9L | 604   | A001   | Sierra Leone and Zaire |
| TIPRLRFTF | F8L/E9L | 622   | A001   | Sierra Leone and Zaire |
| YTYKIVANS | F8L/E9L | 658   | A001   | Sierra Leone and Zaire |
| RSSPLELFM | F8L/E9L | 883   | A001   | Sierra Leone and Zaire |
| SSPLELFML | F8L/E9L | 884   | A001   | Sierra Leone and Zaire |
| LTSEIVNLL | F8L/E9L | 975   | A001   | Sierra Leone and Zaire |
| MSMMNITIL | F12L    | 51    | A001   | Sierra Leone and Zaire |
| ITILEVIGL | F12L    | 56    | A001   | Sierra Leone and Zaire |
| RSSPIPMS  | F12L    | 71    | A001   | Sierra Leone and Zaire |
| SPPIPMSRL | F12L    | 73    | A001   | Sierra Leone and Zaire |
| PIPMSRLFM | F12L    | 75    | A001   | Sierra Leone and Zaire |
| YSPKTSYYP | F12L    | 92    | A001   | Sierra Leone and Zaire |
| YTRPEIDVL | F12L    | 189   | A001   | Sierra Leone and Zaire |
| ISTYPGNTF | F12L    | 243   | A001   | Sierra Leone and Zaire |
| STYPGNTFV | F12L    | 244   | A001   | Sierra Leone and Zaire |

| Sequence   | Antigen | Start | Allele | Virus                  |
|------------|---------|-------|--------|------------------------|
| MTSTRTHIL  | F12L    | 272   | A001   | Sierra Leone and Zaire |
| TSTRTHILV  | F12L    | 273   | A001   | Sierra Leone and Zaire |
| RTIILVGYM  | F12L    | 276   | A001   | Sierra Leone and Zaire |
| MSPCRMFSF  | F12L    | 389   | A001   | Sierra Leone and Zaire |
| NTTTFITVL  | F12L    | 505   | A001   | Sierra Leone and Zaire |
| KTSTLIFFV  | H2R     | 28    | A001   | Sierra Leone and Zaire |
| TSTLIFFVI  | H2R     | 29    | A001   | Sierra Leone and Zaire |
| STLIFFVII  | H2R     | 30    | A001   | Sierra Leone and Zaire |
| ILAISALLL  | H2R     | 38    | A001   | Sierra Leone and Zaire |
| ISALLLWFQ  | H2R     | 41    | A001   | Sierra Leone and Zaire |
| MSPHWCSDL  | H2R     | 177   | A001   | Sierra Leone and Zaire |
| FFPNCVNVF  | I8R     | 10    | A001   | Sierra Leone and Zaire |
| YSQDEFSNM  | I8R     | 22    | A001   | Sierra Leone and Zaire |
| VSPPSLGKP  | I8R     | 73    | A001   | Sierra Leone and Zaire |
| GKPAHINLM  | I8R     | 79    | A001   | Sierra Leone and Zaire |
| ISFECYSFL  | I8R     | 98    | A001   | Sierra Leone and Zaire |
| ITNTEINSF  | I8R     | 109   | A001   | Sierra Leone and Zaire |
| FSKIPLASL  | I8R     | 155   | A001   | Sierra Leone and Zaire |
| LTPKAQREI  | I8R     | 163   | A001   | Sierra Leone and Zaire |
| KTSQVPKLL  | I8R     | 191   | A001   | Sierra Leone and Zaire |
| TSQVPKLLL  | I8R     | 192   | A001   | Sierra Leone and Zaire |
| QVPKLLLWF  | I8R     | 194   | A001   | Sierra Leone and Zaire |
| LSLPRIALV  | I8R     | 225   | A001   | Sierra Leone and Zaire |
| GPISLRYG   | I8R     | 251   | A001   | Sierra Leone and Zaire |
| YTPPDGSSG  | I8R     | 388   | A001   | Sierra Leone and Zaire |
| RLPYDMYII  | I8R     | 416   | A001   | Sierra Leone and Zaire |
| YSSPNVSII  | I8R     | 439   | A001   | Sierra Leone and Zaire |
| SSPNVSIII  | I8R     | 440   | A001   | Sierra Leone and Zaire |
| STPYLESSV  | I8R     | 449   | A001   | Sierra Leone and Zaire |
| VNPGTYVYF  | I8R     | 499   | A001   | Sierra Leone and Zaire |
| GTYYVYFYDL | I8R     | 502   | A001   | Sierra Leone and Zaire |
| YANKFNLTLL | I8R     | 530   | A001   | Sierra Leone and Zaire |
| TLPEDLFII  | I8R     | 537   | A001   | Sierra Leone and Zaire |
| IPTNLDIL   | I8R     | 544   | A001   | Sierra Leone and Zaire |
| ISTETWNKL  | I8R     | 564   | A001   | Sierra Leone and Zaire |
| STETWNKLL  | I8R     | 565   | A001   | Sierra Leone and Zaire |
| LSPILAEEL  | I8R     | 589   | A001   | Sierra Leone and Zaire |
| ATIYYHRPL  | I8R     | 650   | A001   | Sierra Leone and Zaire |
| ISDTIFVPV  | I8R     | 665   | A001   | Sierra Leone and Zaire |
| RSMLSIFNI  | L4R     | 39    | A001   | Sierra Leone and Zaire |

| Sequence   | Antigen | Start | Allele | Virus                  |
|------------|---------|-------|--------|------------------------|
| ITGAMFTTM  | L4R     | 65    | A001   | Sierra Leone and Zaire |
| SSPILCIFE  | L4R     | 136   | A001   | Sierra Leone and Zaire |
| YTPIGDNKA  | L4R     | 163   | A001   | Sierra Leone and Zaire |
| YSPSTSMRL  | L4R     | 185   | A001   | Sierra Leone and Zaire |
| MSVEYYLSL  | M1L     | 1     | A001   | Sierra Leone and Zaire |
| KTPLYYLSG  | M1L     | 102   | A001   | Sierra Leone and Zaire |
| YTDPSERVF  | M1L     | 144   | A001   | Zaire                  |
| KASTISWMM  | M1L     | 183   | A001   | Sierra Leone and Zaire |
| STISWMMKL  | M1L     | 185   | A001   | Sierra Leone and Zaire |
| NTPLHIVCS  | M1L     | 205   | A001   | Sierra Leone and Zaire |
| YVDIINLLL  | M1L     | 218   | A001   | Sierra Leone and Zaire |
| KTLSPAHLI  | M1L     | 247   | A001   | Sierra Leone and Zaire |
| LSPAHLINK  | M1L     | 249   | A001   | Sierra Leone and Zaire |
| TSETMYITM  | M1L     | 376   | A001   | Sierra Leone and Zaire |
| IIPFIAAYF  | M1L     | 396   | A001   | Sierra Leone and Zaire |
| IIPFIAAYFV | M1L     | 397   | A001   | Sierra Leone and Zaire |
| YSSNIIAIL  | N2L     | 49    | A001   | Sierra Leone and Zaire |
| IAILDRFLM  | N2L     | 54    | A001   | Sierra Leone and Zaire |
| HTIDLFKRI  | N2L     | 109   | A001   | Sierra Leone and Zaire |
| YKPIYSYVL  | N2L     | 146   | A001   | Sierra Leone and Zaire |
| YSYVLYENV  | N2L     | 150   | A001   | Sierra Leone and Zaire |
| VSSKHQLVL  | O1L     | 25    | A001   | Sierra Leone and Zaire |
| LLPKSLYLE  | O1L     | 41    | A001   | Sierra Leone and Zaire |
| FFPPEIINV  | O1L     | 60    | A001   | Sierra Leone and Zaire |
| SGPNVVKLM  | O1L     | 99    | A001   | Sierra Leone and Zaire |
| LTHSDLEWL  | O1L     | 113   | A001   | Sierra Leone and Zaire |
| LTVDEIIDL  | O1L     | 146   | A001   | Sierra Leone and Zaire |
| NIPPVHDIL  | O1L     | 186   | A001   | Sierra Leone and Zaire |
| YSPTFIKTI  | O1L     | 225   | A001   | Sierra Leone and Zaire |
| KSVAMFNLE  | O1L     | 268   | A001   | Sierra Leone and Zaire |
| KTDIDTLTL  | O1L     | 278   | A001   | Sierra Leone and Zaire |
| VTDTINTVL  | O1L     | 423   | A001   | Sierra Leone and Zaire |
| WGPLTEILF  | O1L     | 508   | A001   | Sierra Leone and Zaire |
| ITDSLSEFKL | O1L     | 550   | A001   | Sierra Leone and Zaire |
| TVPSYLYHL  | O1L     | 641   | A001   | Sierra Leone and Zaire |
| LSINVISII  | O1L     | 649   | A001   | Sierra Leone and Zaire |
| IGICVAVTV  | A13L    | 8     | A002   | Sierra Leone and Zaire |
| VAVTVAILY  | A13L    | 12    | A002   | Sierra Leone and Zaire |
| VTVAILYTL  | A13L    | 14    | A002   | Sierra Leone and Zaire |
| TVAILYTYL  | A13L    | 15    | A002   | Sierra Leone and Zaire |

| Sequence  | Antigen | Start | Allele | Virus                  |
|-----------|---------|-------|--------|------------------------|
| ILYTLYNKI | A13L    | 18    | A002   | Sierra Leone and Zaire |
| ISNYEPLLL | A14.5L  | 2     | A002   | Sierra Leone and Zaire |
| LVITCCVLL | A14.5L  | 11    | A002   | Sierra Leone and Zaire |
| FTISSKTKI | A14.5L  | 22    | A002   | Sierra Leone and Zaire |
| IVFIWFIFH | A14.5L  | 39    | A002   | Sierra Leone and Zaire |
| IWFIFHFVY | A14.5L  | 42    | A002   | Sierra Leone and Zaire |
| ASITAFKSM | A26L    | 21    | A002   | Sierra Leone and Zaire |
| ISRKHRNII | A26L    | 44    | A002   | Sierra Leone and Zaire |
| ITNVGQYIL | A26L    | 115   | A002   | Sierra Leone and Zaire |
| ITSNDKNLI | A26L    | 146   | A002   | Sierra Leone and Zaire |
| IGSPMYLWF | A26L    | 183   | A002   | Sierra Leone and Zaire |
| GSHVYHEIY | A26L    | 195   | A002   | Sierra Leone and Zaire |
| IGRLLYAFM | A26L    | 214   | A002   | Sierra Leone and Zaire |
| RLLYAFMYI | A26L    | 216   | A002   | Sierra Leone and Zaire |
| FTYLGESWT | A26L    | 240   | A002   | Sierra Leone and Zaire |
| FSLSVPEYI | A26L    | 249   | A002   | Sierra Leone and Zaire |
| LSVPEYILY | A26L    | 251   | A002   | Sierra Leone and Zaire |
| SVFDTIEKF | A26L    | 264   | A002   | Sierra Leone and Zaire |
| FSNDAILVY | A26L    | 272   | A002   | Sierra Leone and Zaire |
| ISDEINRQM | A37R    | 38    | A002   | Sierra Leone and Zaire |
| VSKGPTTIL | A37R    | 120   | A002   | Sierra Leone and Zaire |
| VTSFTNDIL | A37R    | 140   | A002   | Sierra Leone and Zaire |
| TSFTNDILY | A37R    | 141   | A002   | Sierra Leone and Zaire |
| INYLPSVVF | A37R    | 156   | A002   | Sierra Leone           |
| INYLPLSVF | A37R    | 156   | A002   | Zaire                  |
| SVYKKMQSY | A37R    | 234   | A002   | Sierra Leone and Zaire |
| KSSYTNQTL | A3L     | 18    | A002   | Sierra Leone and Zaire |
| YTNQTLSLV | A3L     | 21    | A002   | Sierra Leone and Zaire |
| LSCSVCNSL | A3L     | 41    | A002   | Sierra Leone and Zaire |
| STHDWSTRL | A3L     | 94    | A002   | Sierra Leone and Zaire |
| LSTTRFQSM | A3L     | 200   | A002   | Sierra Leone and Zaire |
| STTRFQSMH | A3L     | 201   | A002   | Sierra Leone and Zaire |
| TTRFQSMHF | A3L     | 202   | A002   | Sierra Leone and Zaire |
| MSSSQDLSF | A3L     | 213   | A002   | Sierra Leone and Zaire |
| SSSQDLSFI | A3L     | 214   | A002   | Sierra Leone and Zaire |
| SSQDLSFIY | A3L     | 215   | A002   | Sierra Leone and Zaire |
| RVKSYNYML | A3L     | 268   | A002   | Sierra Leone and Zaire |
| KSYNYMLLV | A3L     | 270   | A002   | Sierra Leone and Zaire |
| HTMIRKAIM | A3L     | 306   | A002   | Sierra Leone and Zaire |
| ISINSKDIY | A3L     | 402   | A002   | Sierra Leone and Zaire |

| Sequence  | Antigen | Start | Allele | Virus                  |
|-----------|---------|-------|--------|------------------------|
| GTNVMGSAV | A3L     | 443   | A002   | Sierra Leone and Zaire |
| IVNGAMMFY | A3L     | 456   | A002   | Sierra Leone and Zaire |
| FTENGPWMY | A3L     | 536   | A002   | Sierra Leone and Zaire |
| WLNGDGSVF | A3L     | 581   | A002   | Sierra Leone and Zaire |
| LTMEEAMSM | A3L     | 609   | A002   | Sierra Leone and Zaire |
| ISRHCILI  | A3L     | 618   | A002   | Sierra Leone and Zaire |
| SARHITELF | A3L     | 636   | A002   | Sierra Leone and Zaire |
| GGAGFLGRY | A47L    | 8     | A002   | Sierra Leone and Zaire |
| HTAALVDVF | A47L    | 74    | A002   | Sierra Leone and Zaire |
| KSKRMAEQL | A47L    | 149   | A002   | Sierra Leone and Zaire |
| CSYDMFNLL | A47L    | 254   | A002   | Sierra Leone and Zaire |
| GSRIPRWML | A47L    | 272   | A002   | Sierra Leone and Zaire |
| ILFRKPSIL | A47L    | 292   | A002   | Sierra Leone and Zaire |
| YTLKISNTT | A47L    | 303   | A002   | Sierra Leone and Zaire |
| RTNNAELDF | A47L    | 315   | A002   | Sierra Leone and Zaire |
| ISRSRRLFV | A8R     | 35    | A002   | Sierra Leone           |
| LTETMIEAF | A8R     | 109   | A002   | Sierra Leone and Zaire |
| VSSLSEITY | A8R     | 183   | A002   | Sierra Leone and Zaire |
| LSEITYRFY | A8R     | 186   | A002   | Sierra Leone and Zaire |
| WSASTGAVI | A8R     | 205   | A002   | Sierra Leone and Zaire |
| STGAVINQM | A8R     | 208   | A002   | Sierra Leone and Zaire |
| ITVYDKLQL | A8R     | 222   | A002   | Zaire                  |
| KTISVVVLL | B5R     | 2     | A002   | Sierra Leone and Zaire |
| YSTCTVPTM | B5R     | 18    | A002   | Sierra Leone and Zaire |
| VTFTCDSGY | B5R     | 44    | A002   | Sierra Leone and Zaire |
| VSDYVSELY | B5R     | 78    | A002   | Sierra Leone and Zaire |
| LSCNGETKY | B5R     | 99    | A002   | Sierra Leone and Zaire |
| YSFGEYMTI | B5R     | 147   | A002   | Sierra Leone and Zaire |
| MTINCDVGY | B5R     | 153   | A002   | Sierra Leone and Zaire |
| ISGSTFSIG | B5R     | 196   | A002   | Sierra Leone and Zaire |
| STFSIGGVI | B5R     | 199   | A002   | Sierra Leone and Zaire |
| LSCKSGFTL | B5R     | 209   | A002   | Zaire                  |
| GVIFLISII | B5R     | 289   | A002   | Sierra Leone and Zaire |
| SSSVDVDIY | B6R     | 2     | A002   | Sierra Leone and Zaire |
| RAFLLRHYY | B6R     | 14    | A002   | Sierra Leone and Zaire |
| FTRCTVIPF | B6R     | 43    | A002   | Sierra Leone and Zaire |
| RTMPNESRV | B6R     | 56    | A002   | Sierra Leone and Zaire |
| GTGLRFMEM | B6R     | 86    | A002   | Sierra Leone and Zaire |
| RIYIRRTMM | B6R     | 136   | A002   | Sierra Leone and Zaire |
| GTITGGVCY | B6R     | 157   | A002   | Sierra Leone and Zaire |

| Sequence  | Antigen | Start | Allele | Virus                  |
|-----------|---------|-------|--------|------------------------|
| ITGGVCYYL | B6R     | 159   | A002   | Sierra Leone and Zaire |
| GGVCYYLLM | B6R     | 161   | A002   | Sierra Leone and Zaire |
| LLMHLVSLY | B6R     | 167   | A002   | Sierra Leone and Zaire |
| AVLFINSIH | B8R     | 8     | A002   | Sierra Leone and Zaire |
| YGIKTWQTM | B8R     | 48    | A002   | Sierra Leone and Zaire |
| YTNVPEGTY | B8R     | 57    | A002   | Sierra Leone and Zaire |
| QSQSYLTKF | B8R     | 243   | A002   | Sierra Leone and Zaire |
| LTKFLGSTS | B8R     | 248   | A002   | Sierra Leone and Zaire |
| STSNDVTF  | B8R     | 254   | A002   | Sierra Leone and Zaire |
| KLLLIPSVL | C7L     | 4     | A002   | Sierra Leone           |
| FSMGIQHEF | C7L     | 16    | A002   | Sierra Leone           |
| KVNVVDYTF | C7L     | 88    | A002   | Sierra Leone           |
| YSDDENELF | C7L     | 117   | A002   | Sierra Leone and Zaire |
| ISLNMISKK | C7L     | 132   | A002   | Sierra Leone and Zaire |
| FIFGSRKIY | D12L    | 33    | A002   | Sierra Leone and Zaire |
| YTDSVDDLI | D12L    | 41    | A002   | Sierra Leone and Zaire |
| SVDDLIELY | D12L    | 44    | A002   | Sierra Leone and Zaire |
| YSFYKENGL | D12L    | 87    | A002   | Sierra Leone and Zaire |
| VIRFKFITY | D12L    | 166   | A002   | Sierra Leone and Zaire |
| FIRFPHYFY | F8L/E9L | 31    | A002   | Sierra Leone and Zaire |
| RTIDIDETI | F8L/E9L | 64    | A002   | Sierra Leone and Zaire |
| GCLRIQSLM | F8L/E9L | 220   | A002   | Sierra Leone and Zaire |
| LTFDYVVTF | F8L/E9L | 254   | A002   | Sierra Leone and Zaire |
| ISKNAFSCM | F8L/E9L | 349   | A002   | Sierra Leone and Zaire |
| KTDAGAATY | F8L/E9L | 478   | A002   | Sierra Leone           |
| KTDAGASTY | F8L/E9L | 478   | A002   | Zaire                  |
| ATYVLPQSM | F8L/E9L | 484   | A002   | Sierra Leone           |
| STYVLPQSM | F8L/E9L | 484   | A002   | Zaire                  |
| YVLPQSMVF | F8L/E9L | 486   | A002   | Sierra Leone and Zaire |
| KVFAPQKM  | F8L/E9L | 532   | A002   | Sierra Leone and Zaire |
| LIFDYNLY  | F8L/E9L | 546   | A002   | Sierra Leone and Zaire |
| ITVHCEPRL | F8L/E9L | 597   | A002   | Sierra Leone and Zaire |
| VANSVYGLM | F8L/E9L | 663   | A002   | Sierra Leone and Zaire |
| MGFRNSALY | F8L/E9L | 671   | A002   | Sierra Leone and Zaire |
| YRFRFRSVY | F8L/E9L | 741   | A002   | Sierra Leone and Zaire |
| QSKKKYTTM | F8L/E9L | 801   | A002   | Sierra Leone and Zaire |
| YSASSNSKS | F8L/E9L | 811   | A002   | Sierra Leone and Zaire |
| ETRRDVSKF | F8L/E9L | 830   | A002   | Sierra Leone and Zaire |
| RSSPLELFM | F8L/E9L | 883   | A002   | Sierra Leone and Zaire |
| LSRMHHSNY | F8L/E9L | 892   | A002   | Sierra Leone and Zaire |



| Sequence  | Antigen | Start | Allele | Virus                  |
|-----------|---------|-------|--------|------------------------|
| KSADNPNMY | F8L/E9L | 901   | A002   | Sierra Leone and Zaire |
| RSFKLGSNQ | F8L/E9L | 956   | A002   | Sierra Leone and Zaire |
| LTSEIVNLL | F8L/E9L | 975   | A002   | Sierra Leone and Zaire |
| ILRNYLRLY | F12L    | 20    | A002   | Sierra Leone and Zaire |
| MSMMNITIL | F12L    | 51    | A002   | Sierra Leone and Zaire |
| LSSKGLACY | F12L    | 137   | A002   | Sierra Leone and Zaire |
| YTRPEIDVL | F12L    | 189   | A002   | Sierra Leone and Zaire |
| WARISSSLV | F12L    | 210   | A002   | Sierra Leone           |
| ITDNGPIPY | F12L    | 233   | A002   | Sierra Leone and Zaire |
| ISTYPGNTF | F12L    | 243   | A002   | Sierra Leone and Zaire |
| STYPGNTFV | F12L    | 244   | A002   | Sierra Leone and Zaire |
| RTIILVGYM | F12L    | 276   | A002   | Sierra Leone and Zaire |
| LVGYMSNLF | F12L    | 280   | A002   | Sierra Leone and Zaire |
| VLMSPCRMV | F12L    | 387   | A002   | Sierra Leone and Zaire |
| FSFSRIEDM | F12L    | 395   | A002   | Sierra Leone and Zaire |
| VSENTGMGM | F12L    | 412   | A002   | Sierra Leone and Zaire |
| ISYCRAFIY | F12L    | 589   | A002   | Sierra Leone and Zaire |
| SVNACNLEY | H2R     | 7     | A002   | Sierra Leone and Zaire |
| KTSTLIFFV | H2R     | 28    | A002   | Sierra Leone and Zaire |
| STLIFFVII | H2R     | 30    | A002   | Sierra Leone and Zaire |
| GAYFIAMRL | H2R     | 106   | A002   | Sierra Leone and Zaire |
| YSGYFMSPH | H2R     | 172   | A002   | Sierra Leone and Zaire |
| YSQDEFSNM | I8R     | 22    | A002   | Sierra Leone and Zaire |
| FSLAVFPVI | I8R     | 38    | A002   | Sierra Leone and Zaire |
| ISFECYSFL | I8R     | 98    | A002   | Sierra Leone and Zaire |
| ITNTEINSF | I8R     | 109   | A002   | Sierra Leone and Zaire |
| KTSQVPKLL | I8R     | 191   | A002   | Sierra Leone and Zaire |
| YLFGGFSSL | I8R     | 204   | A002   | Sierra Leone           |
| YLFGGFSTL | I8R     | 204   | A002   | Zaire                  |
| STLTKITDF | I8R     | 210   | A002   | Zaire                  |
| LSLTKLFSY | I8R     | 282   | A002   | Sierra Leone and Zaire |
| YSSPNVSII | I8R     | 439   | A002   | Sierra Leone and Zaire |
| VSIISTPY  | I8R     | 444   | A002   | Sierra Leone and Zaire |
| RVNPGTYVY | I8R     | 498   | A002   | Sierra Leone and Zaire |
| YVYFYDLSY | I8R     | 504   | A002   | Sierra Leone and Zaire |
| RTKEYIDSF | I8R     | 554   | A002   | Sierra Leone and Zaire |
| STETWNKLL | I8R     | 565   | A002   | Sierra Leone and Zaire |
| RTGELTSIV | I8R     | 602   | A002   | Sierra Leone and Zaire |
| YIHFCRILF | I8R     | 634   | A002   | Sierra Leone and Zaire |
| ISEYDDLQM | L4R     | 20    | A002   | Sierra Leone and Zaire |

| Sequence  | Antigen | Start | Allele | Virus                  |
|-----------|---------|-------|--------|------------------------|
| KSKFPRSML | L4R     | 34    | A002   | Sierra Leone and Zaire |
| FPRSMLSIF | L4R     | 37    | A002   | Sierra Leone and Zaire |
| IVPRTMSKY | L4R     | 47    | A002   | Sierra Leone and Zaire |
| ITGAMFTTM | L4R     | 65    | A002   | Sierra Leone and Zaire |
| GSSPILCIF | L4R     | 135   | A002   | Sierra Leone and Zaire |
| ETRKKINIY | L4R     | 144   | A002   | Sierra Leone and Zaire |
| NVYSPSTSM | L4R     | 183   | A002   | Sierra Leone and Zaire |
| TSMRLNAIY | L4R     | 189   | A002   | Sierra Leone and Zaire |
| STNKELESY | L4R     | 209   | A002   | Sierra Leone and Zaire |
| SVEYYLSLY | M1L     | 2     | A002   | Sierra Leone and Zaire |
| YTDPSERVF | M1L     | 144   | A002   | Zaire                  |
| KASTISWMM | M1L     | 183   | A002   | Sierra Leone and Zaire |
| STISWMMKL | M1L     | 185   | A002   | Sierra Leone and Zaire |
| KTVKYVDII | M1L     | 214   | A002   | Sierra Leone and Zaire |
| FGDSPLTLL | M1L     | 237   | A002   | Sierra Leone and Zaire |
| KTLSPAHLI | M1L     | 247   | A002   | Sierra Leone and Zaire |
| QTVNICIFY | M1L     | 268   | A002   | Sierra Leone and Zaire |
| AVLSEYETM | M1L     | 326   | A002   | Sierra Leone and Zaire |
| TSETMYITM | M1L     | 376   | A002   | Sierra Leone and Zaire |
| VSYEVFDDY | M1L     | 433   | A002   | Sierra Leone and Zaire |
| YSSNIIAIL | N2L     | 49    | A002   | Sierra Leone and Zaire |
| GGYVNAILY | N2L     | 91    | A002   | Sierra Leone and Zaire |
| RTRYDTFKV | N2L     | 119   | A002   | Sierra Leone and Zaire |
| KVIGFVSIL | N2L     | 135   | A002   | Sierra Leone and Zaire |
| YVLYENVLY | N2L     | 152   | A002   | Sierra Leone and Zaire |
| FARKALSKL | O1L     | 7     | A002   | Sierra Leone and Zaire |
| HGLLPKSLY | O1L     | 39    | A002   | Sierra Leone and Zaire |
| SLYHKNSLM | O1L     | 89    | A002   | Sierra Leone and Zaire |
| LTHSDLEWL | O1L     | 113   | A002   | Sierra Leone and Zaire |
| YLLKINAYM | O1L     | 131   | A002   | Sierra Leone and Zaire |
| ATLHLYNIL | O1L     | 162   | A002   | Sierra Leone and Zaire |
| LSKLTNEEM | O1L     | 194   | A002   | Sierra Leone           |
| SVAMFNLEY | O1L     | 269   | A002   | Sierra Leone and Zaire |
| FVEVNISYY | O1L     | 291   | A002   | Sierra Leone and Zaire |
| ITMQSGDRI | O1L     | 322   | A002   | Sierra Leone and Zaire |
| LTLSVKGIM | O1L     | 414   | A002   | Sierra Leone and Zaire |
| VTDTINTVL | O1L     | 423   | A002   | Sierra Leone and Zaire |
| NSRCLSLFY | O1L     | 457   | A002   | Zaire                  |
| ITDSLFSKL | O1L     | 550   | A002   | Sierra Leone and Zaire |
| VSKVLHTVM | O1L     | 605   | A002   | Sierra Leone and Zaire |

| Sequence   | Antigen | Start | Allele | Virus                  |
|------------|---------|-------|--------|------------------------|
| KGTVP SYLY | O1L     | 639   | A002   | Sierra Leone and Zaire |
| LSINVISII  | O1L     | 649   | A002   | Sierra Leone and Zaire |
